# Supplementary material for: Drought Stress Induced Different Response Mechanisms in Three Dendrobium Species under Different Photosynthetic Pathways
Source: MDPI journal article supplement (doi:10.3390/ijms25052731), 2024-02-27
Supplement: s1 [file Supplemental Table S1.xlsx]

## Sheet: miRNA_Acc.
miRNA_Acc.	Target_Acc.	miRNA_start	miRNA_end	Target_start	Target_end	miRNA_aligned_fragment	alignment	Target_aligned_fragment	Inhibition	Target_Desc.	Multiplicity	Expectation
dof-miR-102	Dc_gene22801	1	21	626	646	ACUCUCCCUCAAGGGCUUCUG	:::::.::: :: :.:::	AUGAAGCUCUUCAGAGGGAGA	Translation		1	5
	Df_PEPC1	1	21	626	646	ACUCUCCCUCAAGGGCUUCUG	:::::.::: :: :.:::	AUGAAGCUCUUCAGAGGGAGA	Translation		1	5
	Dl_PEPC1	1	21	626	646	ACUCUCCCUCAAGGGCUUCUG	:::::.::: :: :.:::	AUGAAGCUCUUCAGAGGGAGA	Translation		1	5
dof-miR-116	Dc_gene22801	1	20	267	286	AGACUACAAUUAUCUGAUCA	:::. ::::.::::.: :	GGAUUCGAUAGUUGUGGCCA	Cleavage		1	5
dof-miR-116	Df_PEPC1	1	20	267	286	AGACUACAAUUAUCUGAUCA	:::. ::::.::::.: :	GGAUUCGAUAGUUGUGGCCA	Cleavage		1	5
dof-miR-116	Dl_PEPC1	1	20	267	286	AGACUACAAUUAUCUGAUCA	:::. ::::.::::.: :	GGAUUCGAUAGUUGUGGCCA	Cleavage		1	5
dof-miR-150	Dc_gene19899	1	23	1934	1956	AGGCAGUGUAGUUAGCUGAUUGC	: ::: :: .:::.::::.::	CAACUCACCUUGCUAUACUGUCU	Cleavage		1	4
	Dc_gene2609	1	23	1931	1953	AGGCAGUGUAGUUAGCUGAUUGC	.: ::: :: .:::.:.::.::	CUACUCACCUUGCUAUAUUGUCU	Cleavage		1	4.5
	Df_PEPC2	1	23	1931	1953	AGGCAGUGUAGUUAGCUGAUUGC	.: ::: :: .:::.:.::.::	CUACUCACCUUGCUAUAUUGUCU	Cleavage		1	4.5
	Df_PEPC3	1	23	1934	1956	AGGCAGUGUAGUUAGCUGAUUGC	: ::: :: .:::.::::.::	CAACUCACCUUGCUAUACUGUCU	Cleavage		1	4
	Dl_PEPC2	1	23	1934	1956	AGGCAGUGUAGUUAGCUGAUUGC	.: ::: :: .:::.:.::.::	CUACUCACCUUGCUAUAUUGUCU	Cleavage		1	4.5
dof-miR-163	Dc_gene19899	1	22	2539	2560	AUAGCUCUUUAAAUGGUACUGC	:.::::::..::::: :	UUGUUGCCAUUUGGAGAGCAAC	Cleavage		1	5
dof-miR-163	Dl_PEPC3	1	22	2539	2560	AUAGCUCUUUAAAUGGUACUGC	:.::::::..::::: :	UUGUUGCCAUUUGGAGAGCAAC	Cleavage		1	5
dof-miR-174	Dc_gene19899	1	19	1100	1118	AUCACAUUGCCAGGGAUUA	: :: :.:::..::::::	UUAUACUUGGUGAUGUGAG	Cleavage		1	4.5
	Dc_gene2609	1	19	1097	1115	AUCACAUUGCCAGGGAUUA	: :: :.:::..::::::	UUAUACUUGGUGAUGUGAG	Cleavage		1	4.5
	Df_PEPC2	1	19	1097	1115	AUCACAUUGCCAGGGAUUA	: :: :.:::..::::::	UUAUACUUGGUGAUGUGAG	Cleavage		1	4.5
	Df_PEPC3	1	19	1100	1118	AUCACAUUGCCAGGGAUUA	: :: :.:::..::::::	UUAUACUUGGUGAUGUGAG	Cleavage		1	4.5
	Dl_PEPC2	1	19	1100	1118	AUCACAUUGCCAGGGAUUA	: :: :.:::..::::::	UUAUACUUGGUGAUGUGAG	Cleavage		1	4.5
	Dl_PEPC3	1	19	1100	1118	AUCACAUUGCCAGGGAUUA	: :: :.:::..::::::	UUAUACUUGGUGAUGUGAG	Cleavage		1	4.5
dof-miR-175	Dc_gene19899	1	21	1098	1118	AUCACAUUGCCAGGGAUUACC	: :: :.:::..::::::	AAUUAUACUUGGUGAUGUGAG	Cleavage		1	4.5
	Dc_gene2609	1	21	1095	1115	AUCACAUUGCCAGGGAUUACC	:: :: :.:::..::::::	UGUUAUACUUGGUGAUGUGAG	Cleavage		1	4.5
	Df_PEPC2	1	21	1095	1115	AUCACAUUGCCAGGGAUUACC	:: :: :.:::..::::::	UGUUAUACUUGGUGAUGUGAG	Cleavage		1	4.5
	Df_PEPC3	1	21	1098	1118	AUCACAUUGCCAGGGAUUACC	: :: :.:::..::::::	AAUUAUACUUGGUGAUGUGAG	Cleavage		1	4.5
	Dl_PEPC2	1	21	1098	1118	AUCACAUUGCCAGGGAUUACC	:: :: :.:::..::::::	UGUUAUACUUGGUGAUGUGAG	Cleavage		1	4.5
	Dl_PEPC3	1	21	1098	1118	AUCACAUUGCCAGGGAUUACC	: :: :.:::..::::::	AAUUAUACUUGGUGAUGUGAG	Cleavage		1	4.5
dof-miR-176	Dc_gene19899	1	22	1097	1118	AUCACAUUGCCAGGGAUUACCA	: :: :.:::..::::::	GAAUUAUACUUGGUGAUGUGAG	Cleavage		1	4.5
	Dc_gene2609	1	22	1094	1115	AUCACAUUGCCAGGGAUUACCA	:: :: :.:::..::::::	GUGUUAUACUUGGUGAUGUGAG	Cleavage		1	4.5
	Df_PEPC2	1	22	1094	1115	AUCACAUUGCCAGGGAUUACCA	:: :: :.:::..::::::	GUGUUAUACUUGGUGAUGUGAG	Cleavage		1	4.5
	Df_PEPC3	1	22	1097	1118	AUCACAUUGCCAGGGAUUACCA	: :: :.:::..::::::	GAAUUAUACUUGGUGAUGUGAG	Cleavage		1	4.5
	Dl_PEPC2	1	22	1097	1118	AUCACAUUGCCAGGGAUUACCA	:: :: :.:::..::::::	GUGUUAUACUUGGUGAUGUGAG	Cleavage		1	4.5
	Dl_PEPC3	1	22	1097	1118	AUCACAUUGCCAGGGAUUACCA	: :: :.:::..::::::	GAAUUAUACUUGGUGAUGUGAG	Cleavage		1	4.5
dof-miR-177	Dc_gene19899	1	23	1096	1118	AUCACAUUGCCAGGGAUUACCAC	: :: :.:::..::::::	AGAAUUAUACUUGGUGAUGUGAG	Cleavage		1	4.5
	Dc_gene2609	1	23	1093	1115	AUCACAUUGCCAGGGAUUACCAC	:: :: :.:::..::::::	CGUGUUAUACUUGGUGAUGUGAG	Cleavage		1	4.5
	Df_PEPC2	1	23	1093	1115	AUCACAUUGCCAGGGAUUACCAC	:: :: :.:::..::::::	CGUGUUAUACUUGGUGAUGUGAG	Cleavage		1	4.5
	Df_PEPC3	1	23	1096	1118	AUCACAUUGCCAGGGAUUACCAC	: :: :.:::..::::::	AGAAUUAUACUUGGUGAUGUGAG	Cleavage		1	4.5
	Dl_PEPC2	1	23	1096	1118	AUCACAUUGCCAGGGAUUACCAC	:: :: :.:::..::::::	CGUGUUAUACUUGGUGAUGUGAG	Cleavage		1	4.5
	Dl_PEPC3	1	23	1096	1118	AUCACAUUGCCAGGGAUUACCAC	: :: :.:::..::::::	AGAAUUAUACUUGGUGAUGUGAG	Cleavage		1	4.5
dof-miR-178	Dc_gene19899	1	24	1095	1118	AUCACAUUGCCAGGGAUUACCACC	: :: :.:::..::::::	UAGAAUUAUACUUGGUGAUGUGAG	Cleavage		1	4.5
	Dc_gene2609	1	24	1092	1115	AUCACAUUGCCAGGGAUUACCACC	:: :: :.:::..::::::	UCGUGUUAUACUUGGUGAUGUGAG	Cleavage		1	4.5
	Df_PEPC2	1	24	1092	1115	AUCACAUUGCCAGGGAUUACCACC	:: :: :.:::..::::::	UCGUGUUAUACUUGGUGAUGUGAG	Cleavage		1	4.5
	Df_PEPC3	1	24	1095	1118	AUCACAUUGCCAGGGAUUACCACC	: :: :.:::..::::::	UAGAAUUAUACUUGGUGAUGUGAG	Cleavage		1	4.5
	Dl_PEPC2	1	24	1095	1118	AUCACAUUGCCAGGGAUUACCACC	:: :: :.:::..::::::	UCGUGUUAUACUUGGUGAUGUGAG	Cleavage		1	4.5
	Dl_PEPC3	1	24	1095	1118	AUCACAUUGCCAGGGAUUACCACC	: :: :.:::..::::::	UAGAAUUAUACUUGGUGAUGUGAG	Cleavage		1	4.5
dof-miR-183	Dc_gene22801	1	21	2460	2480	AUCAUCGUCUCAAAUGAGUCU	::::.. ::::::.:.:: :	CGACUUGGUUGAGAUGGUGUU	Cleavage		1	4.5
dof-miR-183	Df_PEPC1	1	21	2460	2480	AUCAUCGUCUCAAAUGAGUCU	::::.: ::::::.:.:: :	CGACUUAGUUGAGAUGGUGUU	Cleavage		1	4
dof-miR-183	Dl_PEPC1	1	21	2460	2480	AUCAUCGUCUCAAAUGAGUCU	::::.: ::::::.:.:: :	CGACUUAGUUGAGAUGGUGUU	Cleavage		1	4
dof-miR-190	Dc_gene19899	1	21	289	309	AUGAAGUGUUUGGGGGAACUC	::::.:.:: :..::: ::	UCGUUCUCUCAUAUGCUUAAU	Translation		1	5
dof-miR-210	Dc_gene2609	1	21	2174	2194	CAAAGUGCUGUUCGUGCAGGU	:.: :: :::: ::..::::	UCUUCCAAGAACCGCGUUUUG	Cleavage		1	5
dof-miR-211	Dc_gene2609	1	22	2173	2194	CAAAGUGCUGUUCGUGCAGGUA	:.: :: :::: ::..::::	GUCUUCCAAGAACCGCGUUUUG	Cleavage		1	5
dof-miR-212	Dc_gene2609	1	23	2172	2194	CAAAGUGCUGUUCGUGCAGGUAG	:.: :: :::: ::..::::	CGUCUUCCAAGAACCGCGUUUUG	Cleavage		1	5
dof-miR-235	Dl_PEPC3	1	21	2489	2509	CAGCAGCAAUUCAUGUUUUGA	::. :::: :::::::::	GCAGUCCAUGCAUUGCUGCUU	Translation		1	5
dof-miR-240	Dc_gene19899	1	23	1935	1957	CAGGCAGUGUAGUUAGCUGAUUG	: ::: :: .:::.::::.::	AACUCACCUUGCUAUACUGUCUC	Cleavage		1	4.5
	Dc_gene2609	1	23	1932	1954	CAGGCAGUGUAGUUAGCUGAUUG	.: ::: :: .:::.:.::.::	UACUCACCUUGCUAUAUUGUCUC	Cleavage		1	5
	Df_PEPC2	1	23	1932	1954	CAGGCAGUGUAGUUAGCUGAUUG	.: ::: :: .:::.:.::.::	UACUCACCUUGCUAUAUUGUCUC	Cleavage		1	5
	Df_PEPC3	1	23	1935	1957	CAGGCAGUGUAGUUAGCUGAUUG	: ::: :: .:::.::::.::	AACUCACCUUGCUAUACUGUCUC	Cleavage		1	4.5
	Dl_PEPC2	1	23	1935	1957	CAGGCAGUGUAGUUAGCUGAUUG	.: ::: :: .:::.:.::.::	UACUCACCUUGCUAUAUUGUCUC	Cleavage		1	5
	Dl_PEPC3	1	23	1935	1957	CAGGCAGUGUAGUUAGCUGAUUG	:: :: .:::.:.::.::	AACCCACCUUGCUAUAUUGUCUC	Cleavage		1	5
dof-miR-259	Df_PEPC1	1	22	2460	2481	CAUCAUCGUCUCAAAUGAGUCU	::::.: ::::::.:.:: :	CGACUUAGUUGAGAUGGUGUUU	Cleavage		1	5
dof-miR-259	Dl_PEPC1	1	22	2460	2481	CAUCAUCGUCUCAAAUGAGUCU	::::.: ::::::.:.:: :	CGACUUAGUUGAGAUGGUGUUU	Cleavage		1	5
dof-miR-295	Dc_gene22801	1	21	2547	2567	CCUCUGGGCCCUUCCUCCAGU	:.: :.:::. :::.:::::	AUUCGGGGAGAGGCUCAGAGC	Translation		1	5
dof-miR-295	Dl_PEPC1	1	21	2547	2567	CCUCUGGGCCCUUCCUCCAGU	:.: :.:::. :::.:::::	AUUCGGGGAGAGGCUCAGAGC	Translation		1	5
dof-miR-309	Dc_gene2609	1	20	2626	2645	CGUUUCACGUCGGGUUCACC	::::: ::: :: ::::::	GGUGAUCCCUACCUGAAACA	Translation		1	5
dof-miR-309	Df_PEPC2	1	20	2626	2645	CGUUUCACGUCGGGUUCACC	::::: ::: :: ::::::	GGUGAUCCCUACUUGAAACA	Translation		1	5
dof-miR-326	Dc_gene22801	1	20	626	645	CUCUCCCUCAAGGGCUUCUG	:::::.::: :: :.:::	AUGAAGCUCUUCAGAGGGAG	Cleavage		1	5
dof-miR-326	Df_PEPC1	1	20	626	645	CUCUCCCUCAAGGGCUUCUG	:::::.::: :: :.:::	AUGAAGCUCUUCAGAGGGAG	Cleavage		1	5
dof-miR-326	Dl_PEPC1	1	20	626	645	CUCUCCCUCAAGGGCUUCUG	:::::.::: :: :.:::	AUGAAGCUCUUCAGAGGGAG	Cleavage		1	5
dof-miR-335	Df_PEPC2	1	22	2426	2447	CUGGGAGAAGGCUGUUUACUCU	: :::.:...::: :.:..:::	ACAGUGAGUGGCCAUUUUUCAG	Cleavage		1	5
dof-miR-338	Dc_gene22801	1	22	2594	2615	CUGUUGCCACUAACCUCAACCU	:: :::::. :::: ::::	UUCUUAAGGUUGCUGGCCACAG	Translation		1	4.5
dof-miR-338	Df_PEPC1	1	22	2594	2615	CUGUUGCCACUAACCUCAACCU	:: :::::. :::: ::::	UUCUUCAGGUUGCUGGCCACAG	Translation		1	4.5
dof-miR-338	Dl_PEPC1	1	22	2594	2615	CUGUUGCCACUAACCUCAACCU	:: :::::. :::: ::::	UUCUUCAGGUUGCUGGCCACAG	Translation		1	4.5
dof-miR-352	Df_PEPC3	1	24	1533	1555	GAAGUUCUGUUAUACACUCAGGCU	::: :::.:::::::::	AUUUCACGUG-AUAGCAGAACUUC	Cleavage		1	4.5
dof-miR-365	Dc_gene22801	1	22	2818	2839	GCAGUCCAUGGGCAUAUACACU	:::: .:::::.: :::.:::	AGUGAGUAUGCUCCUGGGCUGG	Cleavage		1	5
	Dc_gene2609	1	22	2815	2836	GCAGUCCAUGGGCAUAUACACU	:::: ::::::.: :::.:::	AGUGAAUAUGCUCCUGGGCUGG	Cleavage		1	4.5
	Df_PEPC1	1	22	2821	2842	GCAGUCCAUGGGCAUAUACACU	:::: .:::::.: :::.:::	AGUGAGUAUGCUCCUGGGCUGG	Cleavage		1	5
	Df_PEPC2	1	22	2815	2836	GCAGUCCAUGGGCAUAUACACU	:::: ::::::.: :::.:::	AGUGAAUAUGCUCCUGGGCUGG	Cleavage		1	4.5
	Dl_PEPC1	1	22	2818	2839	GCAGUCCAUGGGCAUAUACACU	:::: .:::::.: :::.:::	AGUGAGUAUGCUCCUGGGCUGG	Cleavage		1	5
	Dl_PEPC2	1	22	2818	2839	GCAGUCCAUGGGCAUAUACACU	:::: ::::::.: :::.:::	AGUGAAUAUGCUCCUGGGCUGG	Cleavage		1	4.5
	Dl_PEPC3	1	22	2818	2839	GCAGUCCAUGGGCAUAUACACU	:::: .:::::.: :::.:::	AGUGAGUAUGCUCCUGGGCUGG	Cleavage		1	5
dof-miR-366	Df_PEPC1	1	21	1521	1541	GCAUGAGGGGAGUCGAGCAGG	: :::::: : :.:::::.	UGUUCUCGACACACUUCAUGU	Translation		1	5
dof-miR-366	Dl_PEPC1	1	21	1521	1541	GCAUGAGGGGAGUCGAGCAGG	: :::::: : :.:::::.	UGUUCUCGACACGCUUCAUGU	Translation		1	5
dof-miR-380	Dc_gene19899	1	21	2321	2341	GGAAUGUUGUCUGGAUCGAGG	: : :: .::::::: :::.:	CAUGGACUCAGACAAGAUUUC	Cleavage		1	4.5
dof-miR-380	Dl_PEPC3	1	21	2321	2341	GGAAUGUUGUCUGGAUCGAGG	: : :: ::::::: :::.:	CAUGGACGCAGACAAGAUUUC	Cleavage		1	5
dof-miR-381	Dc_gene19899	1	21	2321	2341	GGAAUGUUGUCUGGCUCGAGG	: : :: .::::::: :::.:	CAUGGACUCAGACAAGAUUUC	Cleavage		1	4.5
dof-miR-381	Df_PEPC3	1	21	1877	1897	GGAAUGUUGUCUGGCUCGAGG	.::: : :::::..::::	GAGUGAGGCUGACAAUGUUCC	Cleavage		1	5
dof-miR-381	Dl_PEPC3	1	21	2321	2341	GGAAUGUUGUCUGGCUCGAGG	: : :: ::::::: :::.:	CAUGGACGCAGACAAGAUUUC	Cleavage		1	5
dof-miR-382	Df_PEPC3	1	21	1877	1897	GGAAUGUUGUCUGGCUCGGGG	.::: : :::::..::::	GAGUGAGGCUGACAAUGUUCC	Cleavage		1	5
dof-miR-383	Dc_gene19899	1	21	2321	2341	GGAAUGUUGUCUGGUUCAAGG	: : :: .::::::: :::.:	CAUGGACUCAGACAAGAUUUC	Cleavage		1	4.5
	Dc_gene22801	1	21	1877	1897	GGAAUGUUGUCUGGUUCAAGG	:::: : :::::..::::	GGGUGAAACUGACAAUGUUCC	Cleavage		1	4.5
	Df_PEPC1	1	21	1877	1897	GGAAUGUUGUCUGGUUCAAGG	:::: : :::::..::::	GGGUGAAACUGACAAUGUUCC	Cleavage		1	4.5
	Df_PEPC3	1	21	1877	1897	GGAAUGUUGUCUGGUUCAAGG	:::. : :::::..::::	GAGUGAGGCUGACAAUGUUCC	Cleavage		1	5
	Dl_PEPC1	1	21	1877	1897	GGAAUGUUGUCUGGUUCAAGG	:::: : :::::..::::	GGGUGAAACUGACAAUGUUCC	Cleavage		1	4.5
dof-miR-384	Dc_gene19899	1	21	2321	2341	GGAAUGUUGUUUGGCUCGAGG	: : :: .::.:::: :::.:	CAUGGACUCAGACAAGAUUUC	Cleavage		1	5
	Dc_gene22801	1	21	2321	2341	GGAAUGUUGUUUGGCUCGAGG	: : :: .::::::: .::.:	CAUGGACUCAAACAAGGUUUC	Cleavage		1	5
	Dc_gene2609	1	21	2318	2338	GGAAUGUUGUUUGGCUCGAGG	: : :: .::::::: :::.:	CAUGGACUCAAACAAGAUUUC	Cleavage		1	4.5
	Df_PEPC1	1	21	2321	2341	GGAAUGUUGUUUGGCUCGAGG	: : :: .::::::: .::.:	CAUGGACUCAAACAAGGUUUC	Cleavage		1	5
	Df_PEPC2	1	21	2318	2338	GGAAUGUUGUUUGGCUCGAGG	: : :: .::::::: :::.:	CAUGGACUCAAACAAGAUUUC	Cleavage		1	4.5
	Dl_PEPC1	1	21	2321	2341	GGAAUGUUGUUUGGCUCGAGG	: : :: .::::::: .::.:	CGUGGACUCAAACAAGGUUUC	Cleavage		1	5
	Dl_PEPC2	1	21	2321	2341	GGAAUGUUGUUUGGCUCGAGG	: : :: .::::::: :::.:	CAUGGACUCAAACAAGAUUUC	Cleavage		1	4.5
dof-miR-405	Dl_PEPC3	1	19	1326	1344	GUCCAGUUUUCCCAGGAAU	:: .:::: ::.::::::.	AUCUCUGGUAAGACUGGAU	Translation		1	4
dof-miR-406	Dl_PEPC3	1	22	1323	1344	GUCCAGUUUUCCCAGGAAUCCC	:: .:::: ::.::::::.	UCUAUCUCUGGUAAGACUGGAU	Translation		1	4
dof-miR-407	Dl_PEPC3	1	23	1322	1344	GUCCAGUUUUCCCAGGAAUCCCU	:: .:::: ::.::::::.	GUCUAUCUCUGGUAAGACUGGAU	Translation		1	4
dof-miR-498	Df_PEPC2	1	21	2051	2071	UAGCAGCACAGAAAUAUUGGC	::: .:::. ::::::::	UGCAACGUUUUACUGCUGCUA	Translation		1	5
	Df_PEPC3	1	21	2054	2074	UAGCAGCACAGAAAUAUUGGC	::: .:::. ::::::::	UACAACGUUUUACUGCUGCUA	Translation		1	5
	Dl_PEPC3	1	21	2054	2074	UAGCAGCACAGAAAUAUUGGC	::: .:::. ::::::::	UACAACGUUUUACUGCUGCUA	Translation		1	5
dof-miR-499	Df_PEPC2	1	22	2050	2071	UAGCAGCACAGAAAUAUUGGCA	::: .:::. ::::::::	CUGCAACGUUUUACUGCUGCUA	Translation		1	5
	Df_PEPC3	1	22	2053	2074	UAGCAGCACAGAAAUAUUGGCA	::: .:::. ::::::::	CUACAACGUUUUACUGCUGCUA	Translation		1	5
	Dl_PEPC3	1	22	2053	2074	UAGCAGCACAGAAAUAUUGGCA	::: .:::. ::::::::	CUACAACGUUUUACUGCUGCUA	Translation		1	5
dof-miR-51	Dc_gene22801	1	21	2065	2085	AAGCUCAGGAGGGAUAGCACC	::::. : :::.::::: :	ACUGCUGCCACUCUUGAGCAU	Cleavage		1	5
dof-miR-518	Dc_gene22801	1	21	2401	2421	UAGCAGCAUGUAAAUAUUGGA	::: :: ::::::::: :	AAAAAUCUUCACAUGCUGCAA	Cleavage		1	5
	Df_PEPC1	1	21	2401	2421	UAGCAGCAUGUAAAUAUUGGA	::: :: ::::::::: :	AAAAAUCUUCACAUGCUGCAA	Cleavage		1	5
	Dl_PEPC1	1	21	2401	2421	UAGCAGCAUGUAAAUAUUGGA	::: :: ::::::::: :	AAAAAUCUUCACAUGCUGCAA	Cleavage		1	5
dof-miR-519	Dc_gene22801	1	22	2400	2421	UAGCAGCAUGUAAAUAUUGGAG	::: :: ::::::::: :	AAAAAAUCUUCACAUGCUGCAA	Cleavage		1	5
	Df_PEPC1	1	22	2400	2421	UAGCAGCAUGUAAAUAUUGGAG	::: :: ::::::::: :	AAAAAAUCUUCACAUGCUGCAA	Cleavage		1	5
	Dl_PEPC1	1	22	2400	2421	UAGCAGCAUGUAAAUAUUGGAG	::: :: ::::::::: :	AAAAAAUCUUCACAUGCUGCAA	Cleavage		1	5
dof-miR-520	Dc_gene19899	1	21	91	111	UAGCAGCGCAUCAUGGUUUGA	...: .:::::::::: ::	GUGGAGUAUGAUGCGCUUCUU	Cleavage		1	5
dof-miR-532	Dc_gene2609	1	21	2810	2830	UAGGACCAUAUUCACUAUUUG	:::::::::: ::::.	CCACAAGUGAAUAUGCUCCUG	Cleavage		1	5
	Df_PEPC2	1	21	2810	2830	UAGGACCAUAUUCACUAUUUG	:::::::::: ::::.	CCACAAGUGAAUAUGCUCCUG	Cleavage		1	5
	Dl_PEPC2	1	21	2813	2833	UAGGACCAUAUUCACUAUUUG	:::::::::: ::::.	CCACAAGUGAAUAUGCUCCUG	Cleavage		1	5
dof-miR-581	Dc_gene22801	1	21	1836	1855	UCAGAUCAUCUUGCAGCUUCA	: ::::: ::::: ::::: :	UAAAGCU-CAAGAAGAUCUAA	Cleavage		1	5
	Df_PEPC1	1	21	1836	1855	UCAGAUCAUCUUGCAGCUUCA	: ::::: ::::: ::::: :	UAAAGCU-CAAGAAGAUCUAA	Cleavage		1	5
	Dl_PEPC1	1	21	1836	1855	UCAGAUCAUCUUGCAGCUUCA	: ::::: ::::: ::::: :	UAAAGCU-CAAGAAGAUCUAA	Cleavage		1	5
dof-miR-606	Dc_gene19899	1	21	213	233	UCCACAGGCUUUCUUGAACUG	::::: :::::.:: :::	UGAUUCAAAAAAGCUUGAGGA	Cleavage		1	4.5
dof-miR-734	Df_PEPC1	1	20	1145	1164	UGACAGAAGAGGGUGAGCAC	:: :::. : ::::.:::::	GUUCUCGACAUCUUUUGUCA	Translation		1	5
	Dl_PEPC1	1	20	1145	1164	UGACAGAAGAGGGUGAGCAC	:: :::. : ::::.:::::	GUUCUCGGCAUCUUUUGUCA	Translation		1	5
dof-miR-755	Dl_PEPC3	1	22	253	273	UGAGACCUCUGGGUUCUGAGCU	::::..:: :::::.:: ::::	AGCUUGGA-CCCAGGGGACUCA	Cleavage		1	5
dof-miR-78	Dc_gene19899	1	20	2004	2023	AAUGUUGCUCGGUGAACCCC	: : :.:.:::::::. ::	UGAGGUUAUCGAGCAAUCUU	Cleavage		1	5
dof-miR-797	Df_PEPC1	1	22	580	601	UGAUAUGUUUGAUAUAUUAGGU	: .:::. :::: ::::::	CAAUUGUAUGCCAAAGAUAUCA	Cleavage		1	5
	Dl_PEPC1	1	22	580	601	UGAUAUGUUUGAUAUAUUAGGU	: .:::. :::: ::::::	CAAUUGUAUGCCAAAGAUAUCA	Cleavage		1	5
dof-miR-805	Dc_gene2609	1	22	2816	2837	UGCAGUCCAUGGGCAUAUACAC	::: ::::::.: :::.::: :	GUGAAUAUGCUCCUGGGCUGGA	Translation		2	5
	Dc_gene2609	1	22	1001	1022	UGCAGUCCAUGGGCAUAUACAC	:: ::::. ::: .:::::	AACUACAUGCUGAUGAGCUGCA	Translation		2	5
	Df_PEPC2	1	22	2816	2837	UGCAGUCCAUGGGCAUAUACAC	::: ::::::.: :::.::: :	GUGAAUAUGCUCCUGGGCUGGA	Translation		1	5
	Dl_PEPC2	1	22	2819	2840	UGCAGUCCAUGGGCAUAUACAC	::: ::::::.: :::.::: :	GUGAAUAUGCUCCUGGGCUGGA	Translation		1	5
dof-miR-806	Dc_gene2609	1	21	1687	1707	UGCAGUUGUUGUCUCAAGCUU	.: ::::::.::.: :::::	GAUCUUGAGGCAGCUCCUGCA	Cleavage		1	5
	Df_PEPC1	1	21	1690	1710	UGCAGUUGUUGUCUCAAGCUU	.: ::::::.::.:: ::::	GAUCUUGAGGCAGCACCUGCU	Cleavage		1	4.5
	Df_PEPC2	1	21	1687	1707	UGCAGUUGUUGUCUCAAGCUU	.: ::::::.::.: :::::	GAUCUUGAGGCAGCUCCUGCA	Cleavage		1	5
	Dl_PEPC1	1	21	1690	1710	UGCAGUUGUUGUCUCAAGCUU	.: ::::::.::.:: ::::	GAUCUUGAGGCAGCACCUGCU	Cleavage		1	4.5
	Dl_PEPC2	1	21	1690	1710	UGCAGUUGUUGUCUCAAGCUU	.: ::::::.::.: :::::	GAUCUUGAGGCAGCUCCUGCA	Cleavage		1	5
dof-miR-82	Dc_gene2609	1	21	1623	1643	ACAAGUCAGGCUCUUGGGACC	: : ::::::::: : :::	UUUGCAAAGAGCCUGCCAUGU	Cleavage		1	5
dof-miR-83	Dc_gene2609	1	22	1622	1643	ACAAGUCAGGCUCUUGGGACCU	: : ::::::::: : :::	UUUUGCAAAGAGCCUGCCAUGU	Cleavage		1	5
dof-miR-843	Dc_gene22801	1	21	1518	1538	UGGAGUGUGACAAUGGUGUUU	.:.... ::: ::::::.::	UGAUGUUCUUGACACACUUCA	Translation		1	5
dof-miR-844	Dc_gene22801	1	22	1517	1538	UGGAGUGUGACAAUGGUGUUUG	: .:.... ::: ::::::.::	CUGAUGUUCUUGACACACUUCA	Translation		1	5
dof-miR-845	Dc_gene22801	1	23	1516	1538	UGGAGUGUGACAAUGGUGUUUGU	.: .:.... ::: ::::::.::	GCUGAUGUUCUUGACACACUUCA	Translation		1	5
dof-miR-846	Dc_gene22801	1	25	1514	1538	UGGAGUGUGACAAUGGUGUUUGUAU	:.: .:.... ::: ::::::.::	UUGCUGAUGUUCUUGACACACUUCA	Translation		1	5
dof-miR-891	Dc_gene2609	1	20	2682	2701	UGUCAGUUUGUCAAAUACCC	:.::::.:::.:: :::	GAAUGUUUGGCAAGCUUACA	Cleavage		1	5
	Df_PEPC2	1	20	2682	2701	UGUCAGUUUGUCAAAUACCC	:.::::.:::.:: :::	GAAUGUUUGGCAAGCUUACA	Cleavage		1	5
	Dl_PEPC2	1	20	2685	2704	UGUCAGUUUGUCAAAUACCC	:.::::.:::.:: :::	GAAUGUUUGGCAAGCUUACA	Cleavage		1	5
dof-miR-892	Dc_gene2609	1	21	2681	2701	UGUCAGUUUGUCAAAUACCCC	:.::::.:::.:: :::	UGAAUGUUUGGCAAGCUUACA	Cleavage		1	5
	Df_PEPC2	1	21	2681	2701	UGUCAGUUUGUCAAAUACCCC	:.::::.:::.:: :::	UGAAUGUUUGGCAAGCUUACA	Cleavage		1	5
	Dl_PEPC2	1	21	2684	2704	UGUCAGUUUGUCAAAUACCCC	:.::::.:::.:: :::	UGAAUGUUUGGCAAGCUUACA	Cleavage		1	5
dof-miR-893	Dc_gene2609	1	22	2680	2701	UGUCAGUUUGUCAAAUACCCCA	:.::::.:::.:: :::	CUGAAUGUUUGGCAAGCUUACA	Cleavage		1	5
	Df_PEPC2	1	22	2680	2701	UGUCAGUUUGUCAAAUACCCCA	:.::::.:::.:: :::	CUGAAUGUUUGGCAAGCUUACA	Cleavage		1	5
	Dl_PEPC2	1	22	2683	2704	UGUCAGUUUGUCAAAUACCCCA	:.::::.:::.:: :::	CUGAAUGUUUGGCAAGCUUACA	Cleavage		1	5
dof-miR-894	Dc_gene2609	1	23	2679	2701	UGUCAGUUUGUCAAAUACCCCAA	:.::::.:::.:: :::	UCUGAAUGUUUGGCAAGCUUACA	Cleavage		1	5
	Df_PEPC2	1	23	2679	2701	UGUCAGUUUGUCAAAUACCCCAA	:.::::.:::.:: :::	UCUGAAUGUUUGGCAAGCUUACA	Cleavage		1	5
	Dl_PEPC2	1	23	2682	2704	UGUCAGUUUGUCAAAUACCCCAA	:.::::.:::.:: :::	UCUGAAUGUUUGGCAAGCUUACA	Cleavage		1	5
dof-miR-895	Dc_gene2609	1	22	2680	2701	UGUCAGUUUGUCAAAUACCCUA	:.::::.:::.:: :::	CUGAAUGUUUGGCAAGCUUACA	Cleavage		1	5
	Df_PEPC2	1	22	2680	2701	UGUCAGUUUGUCAAAUACCCUA	:.::::.:::.:: :::	CUGAAUGUUUGGCAAGCUUACA	Cleavage		1	5
	Dl_PEPC2	1	22	2683	2704	UGUCAGUUUGUCAAAUACCCUA	:.::::.:::.:: :::	CUGAAUGUUUGGCAAGCUUACA	Cleavage		1	5
dof-miR-905	Dc_gene19899	1	22	1723	1744	UGUGCAAAUCUAUGCAAAACUG	:::: ::::::: :.:::	CUUUUUUCGAUAGAUUGGUACA	Cleavage		1	4
	Dc_gene2609	1	22	1720	1741	UGUGCAAAUCUAUGCAAAACUG	:::: .::::::: :.:.:	CUUUUUUCUAUAGAUUGGUAUA	Cleavage		1	4
	Df_PEPC2	1	22	1720	1741	UGUGCAAAUCUAUGCAAAACUG	:::: .::::::: :.:.:	CUUUUUUCUAUAGAUUGGUAUA	Cleavage		1	4
	Df_PEPC3	1	22	1723	1744	UGUGCAAAUCUAUGCAAAACUG	:::: ::::::: :.:::	CUUUUUUCAAUAGAUUGGUACA	Cleavage		1	4
	Dl_PEPC2	1	22	1723	1744	UGUGCAAAUCUAUGCAAAACUG	:::: .::::::: :.:.:	CUUUUUUCUAUAGAUUGGUAUA	Cleavage		1	4
	Dl_PEPC3	1	22	1723	1744	UGUGCAAAUCUAUGCAAAACUG	:::: ::::::: :.:::	CUUUUUUCAAUAGAUUGGUACA	Cleavage		1	4
dof-miR-906	Dc_gene19899	1	23	1722	1744	UGUGCAAAUCUAUGCAAAACUGA	:::: ::::::: :.:::	ACUUUUUUCGAUAGAUUGGUACA	Cleavage		1	4
	Dc_gene2609	1	23	1719	1741	UGUGCAAAUCUAUGCAAAACUGA	:::: .::::::: :.:.:	GCUUUUUUCUAUAGAUUGGUAUA	Cleavage		1	4
	Df_PEPC2	1	23	1719	1741	UGUGCAAAUCUAUGCAAAACUGA	:::: .::::::: :.:.:	GCUUUUUUCUAUAGAUUGGUAUA	Cleavage		1	4
	Df_PEPC3	1	23	1722	1744	UGUGCAAAUCUAUGCAAAACUGA	:::: ::::::: :.:::	ACUUUUUUCAAUAGAUUGGUACA	Cleavage		1	4
	Dl_PEPC2	1	23	1722	1744	UGUGCAAAUCUAUGCAAAACUGA	:::: .::::::: :.:.:	GCUUUUUUCUAUAGAUUGGUAUA	Cleavage		1	4
	Dl_PEPC3	1	23	1722	1744	UGUGCAAAUCUAUGCAAAACUGA	:::: ::::::: :.:::	ACUUUUUUCAAUAGAUUGGUACA	Cleavage		1	4
dof-miR-924	Dc_gene19899	1	23	428	450	UUACAGUUGUUCAACCAGUUACU	:::: ::::.:::::: ::	AAAAACUAGUUGGACAACUUAAA	Cleavage		1	4.5
	Df_PEPC3	1	23	428	450	UUACAGUUGUUCAACCAGUUACU	:::: ::::.:::::: ::	AAAAACUAGUUGGACAACUUAAA	Cleavage		1	4.5
	Dl_PEPC3	1	23	428	450	UUACAGUUGUUCAACCAGUUACU	:::: ::::.:::::: ::	AAAAACUAGUUGGACAACUUAAA	Cleavage		1	4.5
dof-miR-946	Dc_gene19899	1	21	1411	1431	UUCAAGUAAUUCAGGAUAGGU	:::::: ::::: .: :::.	UCCUAUCGUGAAUGGCCUGAG	Cleavage		1	5
	Df_PEPC3	1	21	1411	1431	UUCAAGUAAUUCAGGAUAGGU	:::::: ::::: .: :::.	UCCUAUCGUGAAUGGCCUGAG	Cleavage		1	5
	Dl_PEPC3	1	21	1411	1431	UUCAAGUAAUUCAGGAUAGGU	:::::: ::::: .: :::.	UCCUAUCGUGAAUGGCCUGAG	Cleavage		1	5
dof-miR-947	Dc_gene19899	1	22	1410	1431	UUCAAGUAAUUCAGGAUAGGUU	: :::::: ::::: .: :::.	AUCCUAUCGUGAAUGGCCUGAG	Cleavage		1	5
	Df_PEPC3	1	22	1410	1431	UUCAAGUAAUUCAGGAUAGGUU	: :::::: ::::: .: :::.	AUCCUAUCGUGAAUGGCCUGAG	Cleavage		1	5
	Dl_PEPC3	1	22	1410	1431	UUCAAGUAAUUCAGGAUAGGUU	: :::::: ::::: .: :::.	AUCCUAUCGUGAAUGGCCUGAG	Cleavage		1	5
dof-miR-984	Dl_PEPC1	1	21	1145	1165	UUGACAGAAGAUAGAGAGCAC	:: ::: :::::.::::::	GUUCUCGGCAUCUUUUGUCAA	Cleavage		1	5

## Sheet: Target_Acc.
Target_Acc.	miRNA_Acc.	miRNA_start	miRNA_end	Target_start	Target_end	miRNA_aligned_fragment	alignment	Target_aligned_fragment	Inhibition	Multiplicity	Expectation
Dc_gene19899	dof-miR-150	1	23	1934	1956	AGGCAGUGUAGUUAGCUGAUUGC	: ::: :: .:::.::::.::	CAACUCACCUUGCUAUACUGUCU	Cleavage	1	4
	dof-miR-905	1	22	1723	1744	UGUGCAAAUCUAUGCAAAACUG	:::: ::::::: :.:::	CUUUUUUCGAUAGAUUGGUACA	Cleavage	1	4
	dof-miR-906	1	23	1722	1744	UGUGCAAAUCUAUGCAAAACUGA	:::: ::::::: :.:::	ACUUUUUUCGAUAGAUUGGUACA	Cleavage	1	4
	dof-miR-174	1	19	1100	1118	AUCACAUUGCCAGGGAUUA	: :: :.:::..::::::	UUAUACUUGGUGAUGUGAG	Cleavage	1	4.5
	dof-miR-175	1	21	1098	1118	AUCACAUUGCCAGGGAUUACC	: :: :.:::..::::::	AAUUAUACUUGGUGAUGUGAG	Cleavage	1	4.5
	dof-miR-176	1	22	1097	1118	AUCACAUUGCCAGGGAUUACCA	: :: :.:::..::::::	GAAUUAUACUUGGUGAUGUGAG	Cleavage	1	4.5
	dof-miR-177	1	23	1096	1118	AUCACAUUGCCAGGGAUUACCAC	: :: :.:::..::::::	AGAAUUAUACUUGGUGAUGUGAG	Cleavage	1	4.5
	dof-miR-178	1	24	1095	1118	AUCACAUUGCCAGGGAUUACCACC	: :: :.:::..::::::	UAGAAUUAUACUUGGUGAUGUGAG	Cleavage	1	4.5
	dof-miR-240	1	23	1935	1957	CAGGCAGUGUAGUUAGCUGAUUG	: ::: :: .:::.::::.::	AACUCACCUUGCUAUACUGUCUC	Cleavage	1	4.5
	dof-miR-380	1	21	2321	2341	GGAAUGUUGUCUGGAUCGAGG	: : :: .::::::: :::.:	CAUGGACUCAGACAAGAUUUC	Cleavage	1	4.5
	dof-miR-381	1	21	2321	2341	GGAAUGUUGUCUGGCUCGAGG	: : :: .::::::: :::.:	CAUGGACUCAGACAAGAUUUC	Cleavage	1	4.5
	dof-miR-383	1	21	2321	2341	GGAAUGUUGUCUGGUUCAAGG	: : :: .::::::: :::.:	CAUGGACUCAGACAAGAUUUC	Cleavage	1	4.5
	dof-miR-606	1	21	213	233	UCCACAGGCUUUCUUGAACUG	::::: :::::.:: :::	UGAUUCAAAAAAGCUUGAGGA	Cleavage	1	4.5
	dof-miR-924	1	23	428	450	UUACAGUUGUUCAACCAGUUACU	:::: ::::.:::::: ::	AAAAACUAGUUGGACAACUUAAA	Cleavage	1	4.5
	dof-miR-163	1	22	2539	2560	AUAGCUCUUUAAAUGGUACUGC	:.::::::..::::: :	UUGUUGCCAUUUGGAGAGCAAC	Cleavage	1	5
	dof-miR-190	1	21	289	309	AUGAAGUGUUUGGGGGAACUC	::::.:.:: :..::: ::	UCGUUCUCUCAUAUGCUUAAU	Translation	1	5
	dof-miR-384	1	21	2321	2341	GGAAUGUUGUUUGGCUCGAGG	: : :: .::.:::: :::.:	CAUGGACUCAGACAAGAUUUC	Cleavage	1	5
	dof-miR-520	1	21	91	111	UAGCAGCGCAUCAUGGUUUGA	...: .:::::::::: ::	GUGGAGUAUGAUGCGCUUCUU	Cleavage	1	5
	dof-miR-78	1	20	2004	2023	AAUGUUGCUCGGUGAACCCC	: : :.:.:::::::. ::	UGAGGUUAUCGAGCAAUCUU	Cleavage	1	5
	dof-miR-946	1	21	1411	1431	UUCAAGUAAUUCAGGAUAGGU	:::::: ::::: .: :::.	UCCUAUCGUGAAUGGCCUGAG	Cleavage	1	5
	dof-miR-947	1	22	1410	1431	UUCAAGUAAUUCAGGAUAGGUU	: :::::: ::::: .: :::.	AUCCUAUCGUGAAUGGCCUGAG	Cleavage	1	5
Dc_gene22801	dof-miR-183	1	21	2460	2480	AUCAUCGUCUCAAAUGAGUCU	::::.. ::::::.:.:: :	CGACUUGGUUGAGAUGGUGUU	Cleavage	1	4.5
	dof-miR-338	1	22	2594	2615	CUGUUGCCACUAACCUCAACCU	:: :::::. :::: ::::	UUCUUAAGGUUGCUGGCCACAG	Translation	1	4.5
	dof-miR-383	1	21	1877	1897	GGAAUGUUGUCUGGUUCAAGG	:::: : :::::..::::	GGGUGAAACUGACAAUGUUCC	Cleavage	1	4.5
	dof-miR-102	1	21	626	646	ACUCUCCCUCAAGGGCUUCUG	:::::.::: :: :.:::	AUGAAGCUCUUCAGAGGGAGA	Translation	1	5
	dof-miR-116	1	20	267	286	AGACUACAAUUAUCUGAUCA	:::. ::::.::::.: :	GGAUUCGAUAGUUGUGGCCA	Cleavage	1	5
	dof-miR-295	1	21	2547	2567	CCUCUGGGCCCUUCCUCCAGU	:.: :.:::. :::.:::::	AUUCGGGGAGAGGCUCAGAGC	Translation	1	5
	dof-miR-326	1	20	626	645	CUCUCCCUCAAGGGCUUCUG	:::::.::: :: :.:::	AUGAAGCUCUUCAGAGGGAG	Cleavage	1	5
	dof-miR-365	1	22	2818	2839	GCAGUCCAUGGGCAUAUACACU	:::: .:::::.: :::.:::	AGUGAGUAUGCUCCUGGGCUGG	Cleavage	1	5
	dof-miR-384	1	21	2321	2341	GGAAUGUUGUUUGGCUCGAGG	: : :: .::::::: .::.:	CAUGGACUCAAACAAGGUUUC	Cleavage	1	5
	dof-miR-51	1	21	2065	2085	AAGCUCAGGAGGGAUAGCACC	::::. : :::.::::: :	ACUGCUGCCACUCUUGAGCAU	Cleavage	1	5
	dof-miR-518	1	21	2401	2421	UAGCAGCAUGUAAAUAUUGGA	::: :: ::::::::: :	AAAAAUCUUCACAUGCUGCAA	Cleavage	1	5
	dof-miR-519	1	22	2400	2421	UAGCAGCAUGUAAAUAUUGGAG	::: :: ::::::::: :	AAAAAAUCUUCACAUGCUGCAA	Cleavage	1	5
	dof-miR-581	1	21	1836	1855	UCAGAUCAUCUUGCAGCUUCA	: ::::: ::::: ::::: :	UAAAGCU-CAAGAAGAUCUAA	Cleavage	1	5
	dof-miR-843	1	21	1518	1538	UGGAGUGUGACAAUGGUGUUU	.:.... ::: ::::::.::	UGAUGUUCUUGACACACUUCA	Translation	1	5
	dof-miR-844	1	22	1517	1538	UGGAGUGUGACAAUGGUGUUUG	: .:.... ::: ::::::.::	CUGAUGUUCUUGACACACUUCA	Translation	1	5
	dof-miR-845	1	23	1516	1538	UGGAGUGUGACAAUGGUGUUUGU	.: .:.... ::: ::::::.::	GCUGAUGUUCUUGACACACUUCA	Translation	1	5
	dof-miR-846	1	25	1514	1538	UGGAGUGUGACAAUGGUGUUUGUAU	:.: .:.... ::: ::::::.::	UUGCUGAUGUUCUUGACACACUUCA	Translation	1	5
Dc_gene2609	dof-miR-905	1	22	1720	1741	UGUGCAAAUCUAUGCAAAACUG	:::: .::::::: :.:.:	CUUUUUUCUAUAGAUUGGUAUA	Cleavage	1	4
	dof-miR-906	1	23	1719	1741	UGUGCAAAUCUAUGCAAAACUGA	:::: .::::::: :.:.:	GCUUUUUUCUAUAGAUUGGUAUA	Cleavage	1	4
	dof-miR-150	1	23	1931	1953	AGGCAGUGUAGUUAGCUGAUUGC	.: ::: :: .:::.:.::.::	CUACUCACCUUGCUAUAUUGUCU	Cleavage	1	4.5
	dof-miR-174	1	19	1097	1115	AUCACAUUGCCAGGGAUUA	: :: :.:::..::::::	UUAUACUUGGUGAUGUGAG	Cleavage	1	4.5
	dof-miR-175	1	21	1095	1115	AUCACAUUGCCAGGGAUUACC	:: :: :.:::..::::::	UGUUAUACUUGGUGAUGUGAG	Cleavage	1	4.5
	dof-miR-176	1	22	1094	1115	AUCACAUUGCCAGGGAUUACCA	:: :: :.:::..::::::	GUGUUAUACUUGGUGAUGUGAG	Cleavage	1	4.5
	dof-miR-177	1	23	1093	1115	AUCACAUUGCCAGGGAUUACCAC	:: :: :.:::..::::::	CGUGUUAUACUUGGUGAUGUGAG	Cleavage	1	4.5
	dof-miR-178	1	24	1092	1115	AUCACAUUGCCAGGGAUUACCACC	:: :: :.:::..::::::	UCGUGUUAUACUUGGUGAUGUGAG	Cleavage	1	4.5
	dof-miR-365	1	22	2815	2836	GCAGUCCAUGGGCAUAUACACU	:::: ::::::.: :::.:::	AGUGAAUAUGCUCCUGGGCUGG	Cleavage	1	4.5
	dof-miR-384	1	21	2318	2338	GGAAUGUUGUUUGGCUCGAGG	: : :: .::::::: :::.:	CAUGGACUCAAACAAGAUUUC	Cleavage	1	4.5
	dof-miR-210	1	21	2174	2194	CAAAGUGCUGUUCGUGCAGGU	:.: :: :::: ::..::::	UCUUCCAAGAACCGCGUUUUG	Cleavage	1	5
	dof-miR-211	1	22	2173	2194	CAAAGUGCUGUUCGUGCAGGUA	:.: :: :::: ::..::::	GUCUUCCAAGAACCGCGUUUUG	Cleavage	1	5
	dof-miR-212	1	23	2172	2194	CAAAGUGCUGUUCGUGCAGGUAG	:.: :: :::: ::..::::	CGUCUUCCAAGAACCGCGUUUUG	Cleavage	1	5
	dof-miR-240	1	23	1932	1954	CAGGCAGUGUAGUUAGCUGAUUG	.: ::: :: .:::.:.::.::	UACUCACCUUGCUAUAUUGUCUC	Cleavage	1	5
	dof-miR-309	1	20	2626	2645	CGUUUCACGUCGGGUUCACC	::::: ::: :: ::::::	GGUGAUCCCUACCUGAAACA	Translation	1	5
	dof-miR-532	1	21	2810	2830	UAGGACCAUAUUCACUAUUUG	:::::::::: ::::.	CCACAAGUGAAUAUGCUCCUG	Cleavage	1	5
	dof-miR-805	1	22	2816	2837	UGCAGUCCAUGGGCAUAUACAC	::: ::::::.: :::.::: :	GUGAAUAUGCUCCUGGGCUGGA	Translation	2	5
	dof-miR-805	1	22	1001	1022	UGCAGUCCAUGGGCAUAUACAC	:: ::::. ::: .:::::	AACUACAUGCUGAUGAGCUGCA	Translation	2	5
	dof-miR-806	1	21	1687	1707	UGCAGUUGUUGUCUCAAGCUU	.: ::::::.::.: :::::	GAUCUUGAGGCAGCUCCUGCA	Cleavage	1	5
	dof-miR-82	1	21	1623	1643	ACAAGUCAGGCUCUUGGGACC	: : ::::::::: : :::	UUUGCAAAGAGCCUGCCAUGU	Cleavage	1	5
	dof-miR-83	1	22	1622	1643	ACAAGUCAGGCUCUUGGGACCU	: : ::::::::: : :::	UUUUGCAAAGAGCCUGCCAUGU	Cleavage	1	5
	dof-miR-891	1	20	2682	2701	UGUCAGUUUGUCAAAUACCC	:.::::.:::.:: :::	GAAUGUUUGGCAAGCUUACA	Cleavage	1	5
	dof-miR-892	1	21	2681	2701	UGUCAGUUUGUCAAAUACCCC	:.::::.:::.:: :::	UGAAUGUUUGGCAAGCUUACA	Cleavage	1	5
	dof-miR-893	1	22	2680	2701	UGUCAGUUUGUCAAAUACCCCA	:.::::.:::.:: :::	CUGAAUGUUUGGCAAGCUUACA	Cleavage	1	5
	dof-miR-894	1	23	2679	2701	UGUCAGUUUGUCAAAUACCCCAA	:.::::.:::.:: :::	UCUGAAUGUUUGGCAAGCUUACA	Cleavage	1	5
	dof-miR-895	1	22	2680	2701	UGUCAGUUUGUCAAAUACCCUA	:.::::.:::.:: :::	CUGAAUGUUUGGCAAGCUUACA	Cleavage	1	5
Df_PEPC1	dof-miR-183	1	21	2460	2480	AUCAUCGUCUCAAAUGAGUCU	::::.: ::::::.:.:: :	CGACUUAGUUGAGAUGGUGUU	Cleavage	1	4
	dof-miR-338	1	22	2594	2615	CUGUUGCCACUAACCUCAACCU	:: :::::. :::: ::::	UUCUUCAGGUUGCUGGCCACAG	Translation	1	4.5
	dof-miR-383	1	21	1877	1897	GGAAUGUUGUCUGGUUCAAGG	:::: : :::::..::::	GGGUGAAACUGACAAUGUUCC	Cleavage	1	4.5
	dof-miR-806	1	21	1690	1710	UGCAGUUGUUGUCUCAAGCUU	.: ::::::.::.:: ::::	GAUCUUGAGGCAGCACCUGCU	Cleavage	1	4.5
	dof-miR-102	1	21	626	646	ACUCUCCCUCAAGGGCUUCUG	:::::.::: :: :.:::	AUGAAGCUCUUCAGAGGGAGA	Translation	1	5
	dof-miR-116	1	20	267	286	AGACUACAAUUAUCUGAUCA	:::. ::::.::::.: :	GGAUUCGAUAGUUGUGGCCA	Cleavage	1	5
	dof-miR-259	1	22	2460	2481	CAUCAUCGUCUCAAAUGAGUCU	::::.: ::::::.:.:: :	CGACUUAGUUGAGAUGGUGUUU	Cleavage	1	5
	dof-miR-326	1	20	626	645	CUCUCCCUCAAGGGCUUCUG	:::::.::: :: :.:::	AUGAAGCUCUUCAGAGGGAG	Cleavage	1	5
	dof-miR-365	1	22	2821	2842	GCAGUCCAUGGGCAUAUACACU	:::: .:::::.: :::.:::	AGUGAGUAUGCUCCUGGGCUGG	Cleavage	1	5
	dof-miR-366	1	21	1521	1541	GCAUGAGGGGAGUCGAGCAGG	: :::::: : :.:::::.	UGUUCUCGACACACUUCAUGU	Translation	1	5
	dof-miR-384	1	21	2321	2341	GGAAUGUUGUUUGGCUCGAGG	: : :: .::::::: .::.:	CAUGGACUCAAACAAGGUUUC	Cleavage	1	5
	dof-miR-518	1	21	2401	2421	UAGCAGCAUGUAAAUAUUGGA	::: :: ::::::::: :	AAAAAUCUUCACAUGCUGCAA	Cleavage	1	5
	dof-miR-519	1	22	2400	2421	UAGCAGCAUGUAAAUAUUGGAG	::: :: ::::::::: :	AAAAAAUCUUCACAUGCUGCAA	Cleavage	1	5
	dof-miR-581	1	21	1836	1855	UCAGAUCAUCUUGCAGCUUCA	: ::::: ::::: ::::: :	UAAAGCU-CAAGAAGAUCUAA	Cleavage	1	5
	dof-miR-734	1	20	1145	1164	UGACAGAAGAGGGUGAGCAC	:: :::. : ::::.:::::	GUUCUCGACAUCUUUUGUCA	Translation	1	5
	dof-miR-797	1	22	580	601	UGAUAUGUUUGAUAUAUUAGGU	: .:::. :::: ::::::	CAAUUGUAUGCCAAAGAUAUCA	Cleavage	1	5
Df_PEPC2	dof-miR-905	1	22	1720	1741	UGUGCAAAUCUAUGCAAAACUG	:::: .::::::: :.:.:	CUUUUUUCUAUAGAUUGGUAUA	Cleavage	1	4
	dof-miR-906	1	23	1719	1741	UGUGCAAAUCUAUGCAAAACUGA	:::: .::::::: :.:.:	GCUUUUUUCUAUAGAUUGGUAUA	Cleavage	1	4
	dof-miR-150	1	23	1931	1953	AGGCAGUGUAGUUAGCUGAUUGC	.: ::: :: .:::.:.::.::	CUACUCACCUUGCUAUAUUGUCU	Cleavage	1	4.5
	dof-miR-174	1	19	1097	1115	AUCACAUUGCCAGGGAUUA	: :: :.:::..::::::	UUAUACUUGGUGAUGUGAG	Cleavage	1	4.5
	dof-miR-175	1	21	1095	1115	AUCACAUUGCCAGGGAUUACC	:: :: :.:::..::::::	UGUUAUACUUGGUGAUGUGAG	Cleavage	1	4.5
	dof-miR-176	1	22	1094	1115	AUCACAUUGCCAGGGAUUACCA	:: :: :.:::..::::::	GUGUUAUACUUGGUGAUGUGAG	Cleavage	1	4.5
	dof-miR-177	1	23	1093	1115	AUCACAUUGCCAGGGAUUACCAC	:: :: :.:::..::::::	CGUGUUAUACUUGGUGAUGUGAG	Cleavage	1	4.5
	dof-miR-178	1	24	1092	1115	AUCACAUUGCCAGGGAUUACCACC	:: :: :.:::..::::::	UCGUGUUAUACUUGGUGAUGUGAG	Cleavage	1	4.5
	dof-miR-365	1	22	2815	2836	GCAGUCCAUGGGCAUAUACACU	:::: ::::::.: :::.:::	AGUGAAUAUGCUCCUGGGCUGG	Cleavage	1	4.5
	dof-miR-384	1	21	2318	2338	GGAAUGUUGUUUGGCUCGAGG	: : :: .::::::: :::.:	CAUGGACUCAAACAAGAUUUC	Cleavage	1	4.5
	dof-miR-240	1	23	1932	1954	CAGGCAGUGUAGUUAGCUGAUUG	.: ::: :: .:::.:.::.::	UACUCACCUUGCUAUAUUGUCUC	Cleavage	1	5
	dof-miR-309	1	20	2626	2645	CGUUUCACGUCGGGUUCACC	::::: ::: :: ::::::	GGUGAUCCCUACUUGAAACA	Translation	1	5
	dof-miR-335	1	22	2426	2447	CUGGGAGAAGGCUGUUUACUCU	: :::.:...::: :.:..:::	ACAGUGAGUGGCCAUUUUUCAG	Cleavage	1	5
	dof-miR-498	1	21	2051	2071	UAGCAGCACAGAAAUAUUGGC	::: .:::. ::::::::	UGCAACGUUUUACUGCUGCUA	Translation	1	5
	dof-miR-499	1	22	2050	2071	UAGCAGCACAGAAAUAUUGGCA	::: .:::. ::::::::	CUGCAACGUUUUACUGCUGCUA	Translation	1	5
	dof-miR-532	1	21	2810	2830	UAGGACCAUAUUCACUAUUUG	:::::::::: ::::.	CCACAAGUGAAUAUGCUCCUG	Cleavage	1	5
	dof-miR-805	1	22	2816	2837	UGCAGUCCAUGGGCAUAUACAC	::: ::::::.: :::.::: :	GUGAAUAUGCUCCUGGGCUGGA	Translation	1	5
	dof-miR-806	1	21	1687	1707	UGCAGUUGUUGUCUCAAGCUU	.: ::::::.::.: :::::	GAUCUUGAGGCAGCUCCUGCA	Cleavage	1	5
	dof-miR-891	1	20	2682	2701	UGUCAGUUUGUCAAAUACCC	:.::::.:::.:: :::	GAAUGUUUGGCAAGCUUACA	Cleavage	1	5
	dof-miR-892	1	21	2681	2701	UGUCAGUUUGUCAAAUACCCC	:.::::.:::.:: :::	UGAAUGUUUGGCAAGCUUACA	Cleavage	1	5
	dof-miR-893	1	22	2680	2701	UGUCAGUUUGUCAAAUACCCCA	:.::::.:::.:: :::	CUGAAUGUUUGGCAAGCUUACA	Cleavage	1	5
	dof-miR-894	1	23	2679	2701	UGUCAGUUUGUCAAAUACCCCAA	:.::::.:::.:: :::	UCUGAAUGUUUGGCAAGCUUACA	Cleavage	1	5
	dof-miR-895	1	22	2680	2701	UGUCAGUUUGUCAAAUACCCUA	:.::::.:::.:: :::	CUGAAUGUUUGGCAAGCUUACA	Cleavage	1	5
Df_PEPC3	dof-miR-150	1	23	1934	1956	AGGCAGUGUAGUUAGCUGAUUGC	: ::: :: .:::.::::.::	CAACUCACCUUGCUAUACUGUCU	Cleavage	1	4
	dof-miR-905	1	22	1723	1744	UGUGCAAAUCUAUGCAAAACUG	:::: ::::::: :.:::	CUUUUUUCAAUAGAUUGGUACA	Cleavage	1	4
	dof-miR-906	1	23	1722	1744	UGUGCAAAUCUAUGCAAAACUGA	:::: ::::::: :.:::	ACUUUUUUCAAUAGAUUGGUACA	Cleavage	1	4
	dof-miR-174	1	19	1100	1118	AUCACAUUGCCAGGGAUUA	: :: :.:::..::::::	UUAUACUUGGUGAUGUGAG	Cleavage	1	4.5
	dof-miR-175	1	21	1098	1118	AUCACAUUGCCAGGGAUUACC	: :: :.:::..::::::	AAUUAUACUUGGUGAUGUGAG	Cleavage	1	4.5
	dof-miR-176	1	22	1097	1118	AUCACAUUGCCAGGGAUUACCA	: :: :.:::..::::::	GAAUUAUACUUGGUGAUGUGAG	Cleavage	1	4.5
	dof-miR-177	1	23	1096	1118	AUCACAUUGCCAGGGAUUACCAC	: :: :.:::..::::::	AGAAUUAUACUUGGUGAUGUGAG	Cleavage	1	4.5
	dof-miR-178	1	24	1095	1118	AUCACAUUGCCAGGGAUUACCACC	: :: :.:::..::::::	UAGAAUUAUACUUGGUGAUGUGAG	Cleavage	1	4.5
	dof-miR-240	1	23	1935	1957	CAGGCAGUGUAGUUAGCUGAUUG	: ::: :: .:::.::::.::	AACUCACCUUGCUAUACUGUCUC	Cleavage	1	4.5
	dof-miR-352	1	24	1533	1555	GAAGUUCUGUUAUACACUCAGGCU	::: :::.:::::::::	AUUUCACGUG-AUAGCAGAACUUC	Cleavage	1	4.5
	dof-miR-924	1	23	428	450	UUACAGUUGUUCAACCAGUUACU	:::: ::::.:::::: ::	AAAAACUAGUUGGACAACUUAAA	Cleavage	1	4.5
	dof-miR-381	1	21	1877	1897	GGAAUGUUGUCUGGCUCGAGG	.::: : :::::..::::	GAGUGAGGCUGACAAUGUUCC	Cleavage	1	5
	dof-miR-382	1	21	1877	1897	GGAAUGUUGUCUGGCUCGGGG	.::: : :::::..::::	GAGUGAGGCUGACAAUGUUCC	Cleavage	1	5
	dof-miR-383	1	21	1877	1897	GGAAUGUUGUCUGGUUCAAGG	:::. : :::::..::::	GAGUGAGGCUGACAAUGUUCC	Cleavage	1	5
	dof-miR-498	1	21	2054	2074	UAGCAGCACAGAAAUAUUGGC	::: .:::. ::::::::	UACAACGUUUUACUGCUGCUA	Translation	1	5
	dof-miR-499	1	22	2053	2074	UAGCAGCACAGAAAUAUUGGCA	::: .:::. ::::::::	CUACAACGUUUUACUGCUGCUA	Translation	1	5
	dof-miR-946	1	21	1411	1431	UUCAAGUAAUUCAGGAUAGGU	:::::: ::::: .: :::.	UCCUAUCGUGAAUGGCCUGAG	Cleavage	1	5
	dof-miR-947	1	22	1410	1431	UUCAAGUAAUUCAGGAUAGGUU	: :::::: ::::: .: :::.	AUCCUAUCGUGAAUGGCCUGAG	Cleavage	1	5
Dl_PEPC1	dof-miR-183	1	21	2460	2480	AUCAUCGUCUCAAAUGAGUCU	::::.: ::::::.:.:: :	CGACUUAGUUGAGAUGGUGUU	Cleavage	1	4
	dof-miR-338	1	22	2594	2615	CUGUUGCCACUAACCUCAACCU	:: :::::. :::: ::::	UUCUUCAGGUUGCUGGCCACAG	Translation	1	4.5
	dof-miR-383	1	21	1877	1897	GGAAUGUUGUCUGGUUCAAGG	:::: : :::::..::::	GGGUGAAACUGACAAUGUUCC	Cleavage	1	4.5
	dof-miR-806	1	21	1690	1710	UGCAGUUGUUGUCUCAAGCUU	.: ::::::.::.:: ::::	GAUCUUGAGGCAGCACCUGCU	Cleavage	1	4.5
	dof-miR-102	1	21	626	646	ACUCUCCCUCAAGGGCUUCUG	:::::.::: :: :.:::	AUGAAGCUCUUCAGAGGGAGA	Translation	1	5
	dof-miR-116	1	20	267	286	AGACUACAAUUAUCUGAUCA	:::. ::::.::::.: :	GGAUUCGAUAGUUGUGGCCA	Cleavage	1	5
	dof-miR-259	1	22	2460	2481	CAUCAUCGUCUCAAAUGAGUCU	::::.: ::::::.:.:: :	CGACUUAGUUGAGAUGGUGUUU	Cleavage	1	5
	dof-miR-295	1	21	2547	2567	CCUCUGGGCCCUUCCUCCAGU	:.: :.:::. :::.:::::	AUUCGGGGAGAGGCUCAGAGC	Translation	1	5
	dof-miR-326	1	20	626	645	CUCUCCCUCAAGGGCUUCUG	:::::.::: :: :.:::	AUGAAGCUCUUCAGAGGGAG	Cleavage	1	5
	dof-miR-365	1	22	2818	2839	GCAGUCCAUGGGCAUAUACACU	:::: .:::::.: :::.:::	AGUGAGUAUGCUCCUGGGCUGG	Cleavage	1	5
	dof-miR-366	1	21	1521	1541	GCAUGAGGGGAGUCGAGCAGG	: :::::: : :.:::::.	UGUUCUCGACACGCUUCAUGU	Translation	1	5
	dof-miR-384	1	21	2321	2341	GGAAUGUUGUUUGGCUCGAGG	: : :: .::::::: .::.:	CGUGGACUCAAACAAGGUUUC	Cleavage	1	5
	dof-miR-518	1	21	2401	2421	UAGCAGCAUGUAAAUAUUGGA	::: :: ::::::::: :	AAAAAUCUUCACAUGCUGCAA	Cleavage	1	5
	dof-miR-519	1	22	2400	2421	UAGCAGCAUGUAAAUAUUGGAG	::: :: ::::::::: :	AAAAAAUCUUCACAUGCUGCAA	Cleavage	1	5
	dof-miR-581	1	21	1836	1855	UCAGAUCAUCUUGCAGCUUCA	: ::::: ::::: ::::: :	UAAAGCU-CAAGAAGAUCUAA	Cleavage	1	5
	dof-miR-734	1	20	1145	1164	UGACAGAAGAGGGUGAGCAC	:: :::. : ::::.:::::	GUUCUCGGCAUCUUUUGUCA	Translation	1	5
	dof-miR-797	1	22	580	601	UGAUAUGUUUGAUAUAUUAGGU	: .:::. :::: ::::::	CAAUUGUAUGCCAAAGAUAUCA	Cleavage	1	5
	dof-miR-984	1	21	1145	1165	UUGACAGAAGAUAGAGAGCAC	:: ::: :::::.::::::	GUUCUCGGCAUCUUUUGUCAA	Cleavage	1	5
Dl_PEPC2	dof-miR-905	1	22	1723	1744	UGUGCAAAUCUAUGCAAAACUG	:::: .::::::: :.:.:	CUUUUUUCUAUAGAUUGGUAUA	Cleavage	1	4
	dof-miR-906	1	23	1722	1744	UGUGCAAAUCUAUGCAAAACUGA	:::: .::::::: :.:.:	GCUUUUUUCUAUAGAUUGGUAUA	Cleavage	1	4
	dof-miR-150	1	23	1934	1956	AGGCAGUGUAGUUAGCUGAUUGC	.: ::: :: .:::.:.::.::	CUACUCACCUUGCUAUAUUGUCU	Cleavage	1	4.5
	dof-miR-174	1	19	1100	1118	AUCACAUUGCCAGGGAUUA	: :: :.:::..::::::	UUAUACUUGGUGAUGUGAG	Cleavage	1	4.5
	dof-miR-175	1	21	1098	1118	AUCACAUUGCCAGGGAUUACC	:: :: :.:::..::::::	UGUUAUACUUGGUGAUGUGAG	Cleavage	1	4.5
	dof-miR-176	1	22	1097	1118	AUCACAUUGCCAGGGAUUACCA	:: :: :.:::..::::::	GUGUUAUACUUGGUGAUGUGAG	Cleavage	1	4.5
	dof-miR-177	1	23	1096	1118	AUCACAUUGCCAGGGAUUACCAC	:: :: :.:::..::::::	CGUGUUAUACUUGGUGAUGUGAG	Cleavage	1	4.5
	dof-miR-178	1	24	1095	1118	AUCACAUUGCCAGGGAUUACCACC	:: :: :.:::..::::::	UCGUGUUAUACUUGGUGAUGUGAG	Cleavage	1	4.5
	dof-miR-365	1	22	2818	2839	GCAGUCCAUGGGCAUAUACACU	:::: ::::::.: :::.:::	AGUGAAUAUGCUCCUGGGCUGG	Cleavage	1	4.5
	dof-miR-384	1	21	2321	2341	GGAAUGUUGUUUGGCUCGAGG	: : :: .::::::: :::.:	CAUGGACUCAAACAAGAUUUC	Cleavage	1	4.5
	dof-miR-240	1	23	1935	1957	CAGGCAGUGUAGUUAGCUGAUUG	.: ::: :: .:::.:.::.::	UACUCACCUUGCUAUAUUGUCUC	Cleavage	1	5
	dof-miR-532	1	21	2813	2833	UAGGACCAUAUUCACUAUUUG	:::::::::: ::::.	CCACAAGUGAAUAUGCUCCUG	Cleavage	1	5
	dof-miR-805	1	22	2819	2840	UGCAGUCCAUGGGCAUAUACAC	::: ::::::.: :::.::: :	GUGAAUAUGCUCCUGGGCUGGA	Translation	1	5
	dof-miR-806	1	21	1690	1710	UGCAGUUGUUGUCUCAAGCUU	.: ::::::.::.: :::::	GAUCUUGAGGCAGCUCCUGCA	Cleavage	1	5
	dof-miR-891	1	20	2685	2704	UGUCAGUUUGUCAAAUACCC	:.::::.:::.:: :::	GAAUGUUUGGCAAGCUUACA	Cleavage	1	5
	dof-miR-892	1	21	2684	2704	UGUCAGUUUGUCAAAUACCCC	:.::::.:::.:: :::	UGAAUGUUUGGCAAGCUUACA	Cleavage	1	5
	dof-miR-893	1	22	2683	2704	UGUCAGUUUGUCAAAUACCCCA	:.::::.:::.:: :::	CUGAAUGUUUGGCAAGCUUACA	Cleavage	1	5
	dof-miR-894	1	23	2682	2704	UGUCAGUUUGUCAAAUACCCCAA	:.::::.:::.:: :::	UCUGAAUGUUUGGCAAGCUUACA	Cleavage	1	5
	dof-miR-895	1	22	2683	2704	UGUCAGUUUGUCAAAUACCCUA	:.::::.:::.:: :::	CUGAAUGUUUGGCAAGCUUACA	Cleavage	1	5
Dl_PEPC3	dof-miR-405	1	19	1326	1344	GUCCAGUUUUCCCAGGAAU	:: .:::: ::.::::::.	AUCUCUGGUAAGACUGGAU	Translation	1	4
	dof-miR-406	1	22	1323	1344	GUCCAGUUUUCCCAGGAAUCCC	:: .:::: ::.::::::.	UCUAUCUCUGGUAAGACUGGAU	Translation	1	4
	dof-miR-407	1	23	1322	1344	GUCCAGUUUUCCCAGGAAUCCCU	:: .:::: ::.::::::.	GUCUAUCUCUGGUAAGACUGGAU	Translation	1	4
	dof-miR-905	1	22	1723	1744	UGUGCAAAUCUAUGCAAAACUG	:::: ::::::: :.:::	CUUUUUUCAAUAGAUUGGUACA	Cleavage	1	4
	dof-miR-906	1	23	1722	1744	UGUGCAAAUCUAUGCAAAACUGA	:::: ::::::: :.:::	ACUUUUUUCAAUAGAUUGGUACA	Cleavage	1	4
	dof-miR-174	1	19	1100	1118	AUCACAUUGCCAGGGAUUA	: :: :.:::..::::::	UUAUACUUGGUGAUGUGAG	Cleavage	1	4.5
	dof-miR-175	1	21	1098	1118	AUCACAUUGCCAGGGAUUACC	: :: :.:::..::::::	AAUUAUACUUGGUGAUGUGAG	Cleavage	1	4.5
	dof-miR-176	1	22	1097	1118	AUCACAUUGCCAGGGAUUACCA	: :: :.:::..::::::	GAAUUAUACUUGGUGAUGUGAG	Cleavage	1	4.5
	dof-miR-177	1	23	1096	1118	AUCACAUUGCCAGGGAUUACCAC	: :: :.:::..::::::	AGAAUUAUACUUGGUGAUGUGAG	Cleavage	1	4.5
	dof-miR-178	1	24	1095	1118	AUCACAUUGCCAGGGAUUACCACC	: :: :.:::..::::::	UAGAAUUAUACUUGGUGAUGUGAG	Cleavage	1	4.5
	dof-miR-924	1	23	428	450	UUACAGUUGUUCAACCAGUUACU	:::: ::::.:::::: ::	AAAAACUAGUUGGACAACUUAAA	Cleavage	1	4.5
	dof-miR-163	1	22	2539	2560	AUAGCUCUUUAAAUGGUACUGC	:.::::::..::::: :	UUGUUGCCAUUUGGAGAGCAAC	Cleavage	1	5
	dof-miR-235	1	21	2489	2509	CAGCAGCAAUUCAUGUUUUGA	::. :::: :::::::::	GCAGUCCAUGCAUUGCUGCUU	Translation	1	5
	dof-miR-240	1	23	1935	1957	CAGGCAGUGUAGUUAGCUGAUUG	:: :: .:::.:.::.::	AACCCACCUUGCUAUAUUGUCUC	Cleavage	1	5
	dof-miR-365	1	22	2818	2839	GCAGUCCAUGGGCAUAUACACU	:::: .:::::.: :::.:::	AGUGAGUAUGCUCCUGGGCUGG	Cleavage	1	5
	dof-miR-380	1	21	2321	2341	GGAAUGUUGUCUGGAUCGAGG	: : :: ::::::: :::.:	CAUGGACGCAGACAAGAUUUC	Cleavage	1	5
	dof-miR-381	1	21	2321	2341	GGAAUGUUGUCUGGCUCGAGG	: : :: ::::::: :::.:	CAUGGACGCAGACAAGAUUUC	Cleavage	1	5
	dof-miR-498	1	21	2054	2074	UAGCAGCACAGAAAUAUUGGC	::: .:::. ::::::::	UACAACGUUUUACUGCUGCUA	Translation	1	5
	dof-miR-499	1	22	2053	2074	UAGCAGCACAGAAAUAUUGGCA	::: .:::. ::::::::	CUACAACGUUUUACUGCUGCUA	Translation	1	5
	dof-miR-755	1	22	253	273	UGAGACCUCUGGGUUCUGAGCU	::::..:: :::::.:: ::::	AGCUUGGA-CCCAGGGGACUCA	Cleavage	1	5
	dof-miR-946	1	21	1411	1431	UUCAAGUAAUUCAGGAUAGGU	:::::: ::::: .: :::.	UCCUAUCGUGAAUGGCCUGAG	Cleavage	1	5
	dof-miR-947	1	22	1410	1431	UUCAAGUAAUUCAGGAUAGGUU	: :::::: ::::: .: :::.	AUCCUAUCGUGAAUGGCCUGAG	Cleavage	1	5

## Sheet: Primer for rt-PCR
gene Acc.	Primer name	5’→3’sequence
ACTIN	Actin-3-F	CATGCGATTCTCAGGCTTG
	Actin-3-R	TCCCGTTCTGCTGTTGTTG
97432-c0	97432-c0-F	AGACTCAGACTCCGTTATCCTTACA,
	97432-c0-R	CAAAATCAGGGTGTCTTCCAG；
C48110-c0	C48110-c0-F	TGGTATTCACTAAGGGCAGT,
	C48110-c0-R	TTCAGAGTTGTTATGTAGG；
C87757-c0	C87757-c0-F	GGCATTCTTCTTGACTGA,
	C87757-c0-R	TTTGAAAGACCACGAGAG;
c76953-c1	c76953-c1-F	GGAAGCCGACCATCTAAACG,
	c76953-c1-R	GAATGCTGTCCCAAAACCAA;
C78089-c0	C78089-c0-F	CATCAGTGTGCCTATCAG,
	C78089-c0-R	TTCTCCGCCAAGTATCTA;
c73644-c0	c73644-c0-F	TTCATCACCACCAATAAC,
	c73644-c0-R	CTTCTCCAACATCTTCATA;
Gene_2609	Gene_2609-F	CAGGCATCGCTGCTTTGTA,
	Gene_2609-R	AAGGTCTCTTCAGCATCCG;
Gene_22801	Gene_22801-F	GGAGGAGCTTGGGGATGTGC,
	Gene_22801-R	TTGGATGTGCAGTAAAAA;
Gene_19899	Gene_19899-F	ATGGCCGTTTTTTAGGGTCA,
	Gene_19899-R	GCAGAAGAAGGCGTTTTGTC;
